# Supplementary material
Source: publisher figshare collection journal article supplement (https://gsajournals.figshare.com/ndownloader/files/27743292)
Supplement: Supplementary file 1 [file 27743292]

| **Table S14.** Basic characteristics of reads in 21 libraries and data for sequencing. | | | | | | |  |
| --- | --- | --- | --- | --- | --- | --- | --- |
| **Tissue samples** | **Groups** | **Sample ID** | **Read order** | **Yield (Bases)** | **Reads** | **% of >= Q30** | **Mean quanlity** |
| Liver | NT | N1 | R1 | 2,486,895,932 | 24,622,732 | 94.30 | 35.04 |
| N1 | R2 | 2,486,895,932 | 24,622,732 | 91.67 | 34.49 |
| N2 | R1 | 2,341,009,916 | 23,178,316 | 94.25 | 35.03 |
| N2 | R2 | 2,341,009,916 | 23,178,316 | 89.96 | 34.07 |
| N3 | R1 | 2,286,292,964 | 22,636,564 | 94.33 | 35.05 |
| N3 | R2 | 2,286,292,964 | 22,636,564 | 92.30 | 34.57 |
| N4 | R1 | 2,355,730,565 | 23,324,065 | 94.16 | 35.02 |
| N4 | R2 | 2,355,730,565 | 23,324,065 | 87.94 | 33.60 |
| N5 | R1 | 2,343,819,332 | 23,206,132 | 94.18 | 35.02 |
| N5 | R2 | 2,343,819,332 | 23,206,132 | 89.44 | 33.97 |
| HT | H1 | R1 | 2,449,750,556 | 24,254,956 | 94.34 | 35.05 |
| H1 | R2 | 2,449,750,556 | 24,254,956 | 89.73 | 34.02 |
| H2 | R1 | 2,505,107,141 | 24,803,041 | 94.37 | 35.06 |
| H2 | R2 | 2,505,107,141 | 24,803,041 | 90.92 | 34.28 |
| H3 | R1 | 2,418,239,566 | 23,942,966 | 94.41 | 35.06 |
| H3 | R2 | 2,418,239,566 | 23,942,966 | 90.63 | 34.19 |
| H4 | R1 | 2,432,620,148 | 24,085,348 | 94.35 | 35.05 |
| H4 | R2 | 2,432,620,148 | 24,085,348 | 90.35 | 34.14 |
| H5 | R1 | 2,444,682,881 | 24,204,781 | 94.30 | 35.04 |
| H5 | R2 | 2,444,682,881 | 24,204,781 | 90.05 | 34.09 |
| Muscle | NT | N1 | R1 | 2,251,618,048 | 22,293,248 | 94.35 | 35.05 |
| N1 | R2 | 2,251,618,048 | 22,293,248 | 90.35 | 34.16 |
| N2 | R1 | 2,425,705,587 | 24,016,887 | 94.37 | 35.05 |
| N2 | R2 | 2,425,705,587 | 24,016,887 | 89.73 | 34.00 |
| N3 | R1 | 2,349,585,624 | 23,263,224 | 94.23 | 35.03 |
| N3 | R2 | 2,349,585,624 | 23,263,224 | 89.83 | 34.02 |
| N4 | R1 | 2,337,469,058 | 23,143,258 | 94.47 | 35.07 |
| N4 | R2 | 2,337,469,058 | 23,143,258 | 91.17 | 34.34 |
| N5 | R1 | 2,353,365,246 | 23,300,646 | 94.49 | 35.08 |
| N5 | R2 | 2,353,365,246 | 23,300,646 | 91.47 | 34.43 |
| HT | H1 | R1 | 2,436,165,046 | 24,120,446 | 94.55 | 35.09 |
| H1 | R2 | 2,436,165,046 | 24,120,446 | 91.13 | 34.38 |
| H2 | R1 | 2,414,016,453 | 23,901,153 | 94.58 | 35.09 |
| H2 | R2 | 2,414,016,453 | 23,901,153 | 90.49 | 34.23 |
| H3 | R1 | 2,491,257,314 | 24,665,914 | 94.19 | 35.02 |
| H3 | R2 | 2,491,257,314 | 24,665,914 | 89.64 | 33.99 |
| H4 | R1 | 2,457,372,521 | 24,330,421 | 94.36 | 35.05 |
| H4 | R2 | 2,457,372,521 | 24,330,421 | 91.61 | 34.44 |
| H5 | R1 | 2,293,533,149 | 22,708,249 | 94.39 | 35.06 |
| H5 | R2 | 2,293,533,149 | 22,708,249 | 91.62 | 34.43 |
| H6 | R1 | 2,488,465,169 | 24,638,269 | 94.04 | 34.99 |
| H6 | R2 | 2,488,465,169 | 24,638,269 | 89.28 | 33.93 |
